# Supplementary material
Source: PubMed Central journal article supplement (PMC5183566)
Supplement: NIHMS811086-supplement-supplement_1.pdf [file NIHMS811086-supplement-supplement_1.pdf]

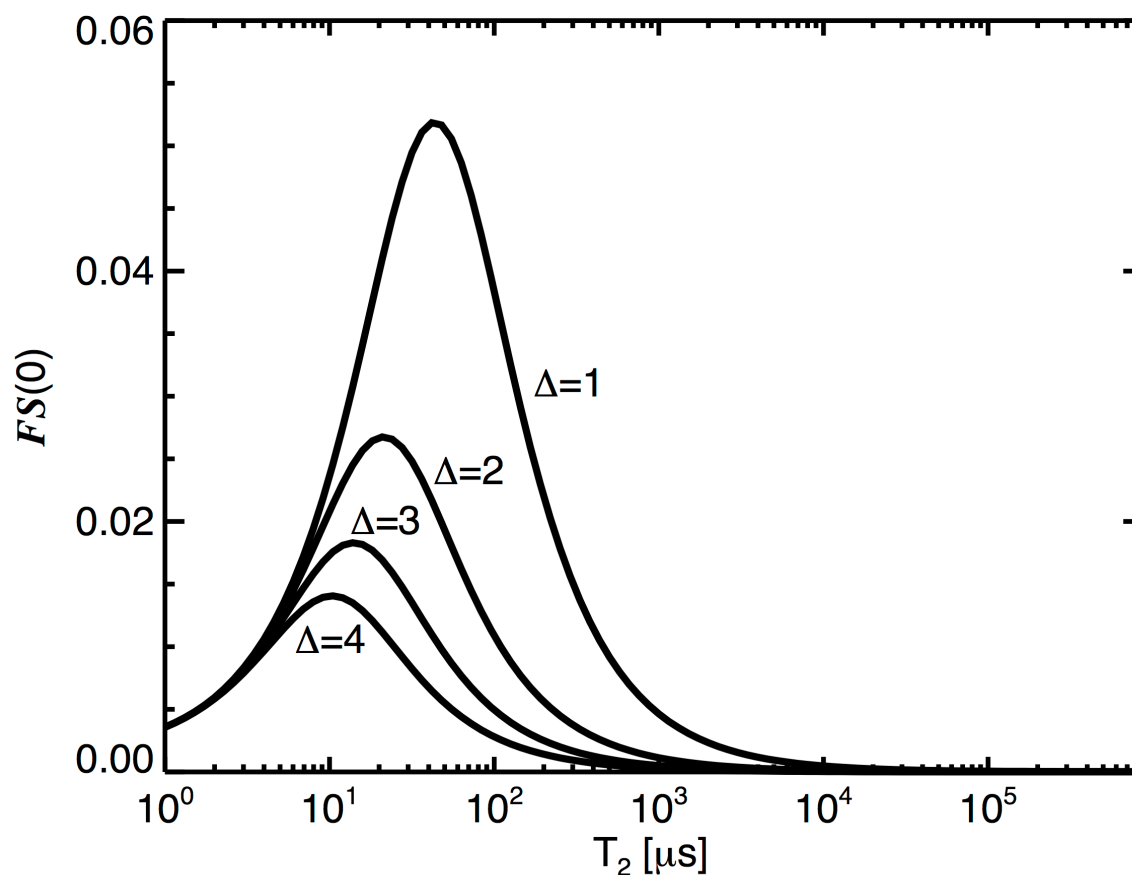

**Figure S1.** Simulation of effects of the slice excitation pulse on the MP saturation in neighboring slices as function of  $T_2$ . Considered are the four equally spaced slice excitations one to four slices removed from the measurement slice ( $\Delta=1$  to 4). A small but significant effect is seen that is strongest in the nearest slice and diminishes quickly with increasing separation. The slices had a 5.4 mm center-to-center spacing, and a 2 mm thickness, resulting in 3.7 kHz frequency offset between slices. Some flexibility exists in minimizing these effects by judiciously choosing slice selection parameters; in addition, since the same saturation effects are present in the reference scans without MT pulses, to first order approximation the small additional saturation from the excitation pulses will cancel out.

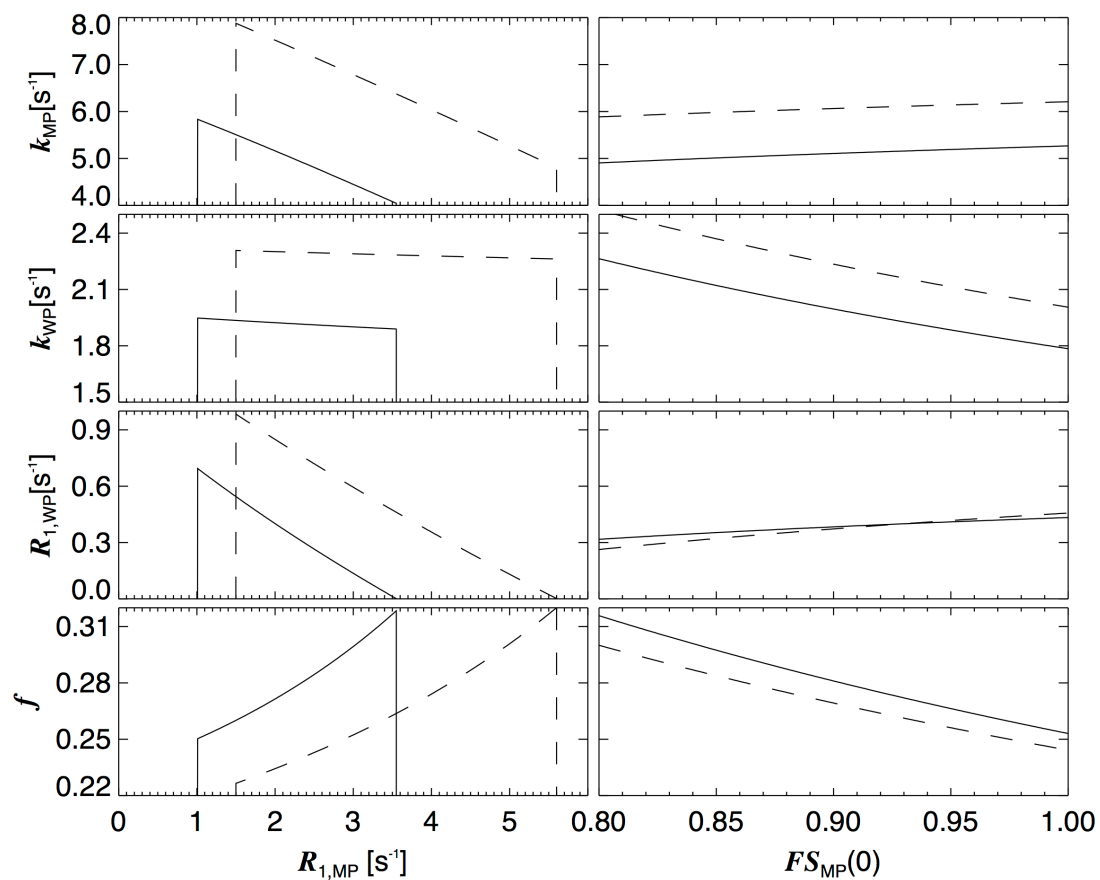

**Figure S2.** Simulated dependence of the extracted parameters (approach 2) on values assumed for  $R_{1,MP}$  and  $FS_{MP}(0)$ , based on experimentally derived values for  $a$ ,  $b$ ,  $\lambda_1$  and  $\lambda_2$  (Eq. [1]). The dashed lines are for 3 T data, the solid lines for 7 T. Actual (experimental) values were:  $R_{1,MP} = 4.0 \text{ s}^{-1}$ ,  $FS_{MP}(0) = 0.88$  for 3 T and  $R_{1,MP} = 2.05 \text{ s}^{-1}$ ,  $FS_{MP}(0) = 0.93$  for 7 T.
